# Supplementary material for: Forward genetic screen for auxin-deficient mutants by cytokinin
Source: PubMed Central journal article supplement (PMC4491711; doi:10.1038/srep11923), 2015-07-06
Supplement: srep11923-s1.pdf [file srep11923-s1.pdf]

# Forward genetic screen for auxin-deficient mutants by cytokinin

Lei Wu<sup>1,+</sup>, Pan Luo<sup>1,+</sup>, Dong-Wei Di<sup>1,+</sup>, Li Wang<sup>1</sup>, Ming Wang<sup>1</sup>, Cheng-Kai Lu<sup>1</sup>, Shao-Dong Wei<sup>1</sup>, Li Zhang<sup>1</sup>, Tian-Zi Zhang<sup>1</sup>, Petra AMAKOROVÁ<sup>2</sup>, Miroslav STRNAD<sup>2</sup>, Ondřej NOVÁK<sup>2</sup> and Guang-Qin Guo<sup>1,\*</sup>

<sup>1</sup>Institute of Cell Biology and MOE Key Laboratory of Cell Activities and Stress Adaptations, Lanzhou University, Lanzhou 730000, China

<sup>2</sup>Laboratory of Growth Regulators, Centre of the Region Haná for Biotechnological and Agricultural Research, Institute of Experimental Botany ASCR and Palacký University, Šlechtitelů 11, Olomouc CZ-783 71, Czech Republic

\*Corresponding. gqguo@lzu.edu.cn

<sup>+</sup>These authors contributed equally to this work

The author(s) declare no competing financial interests.

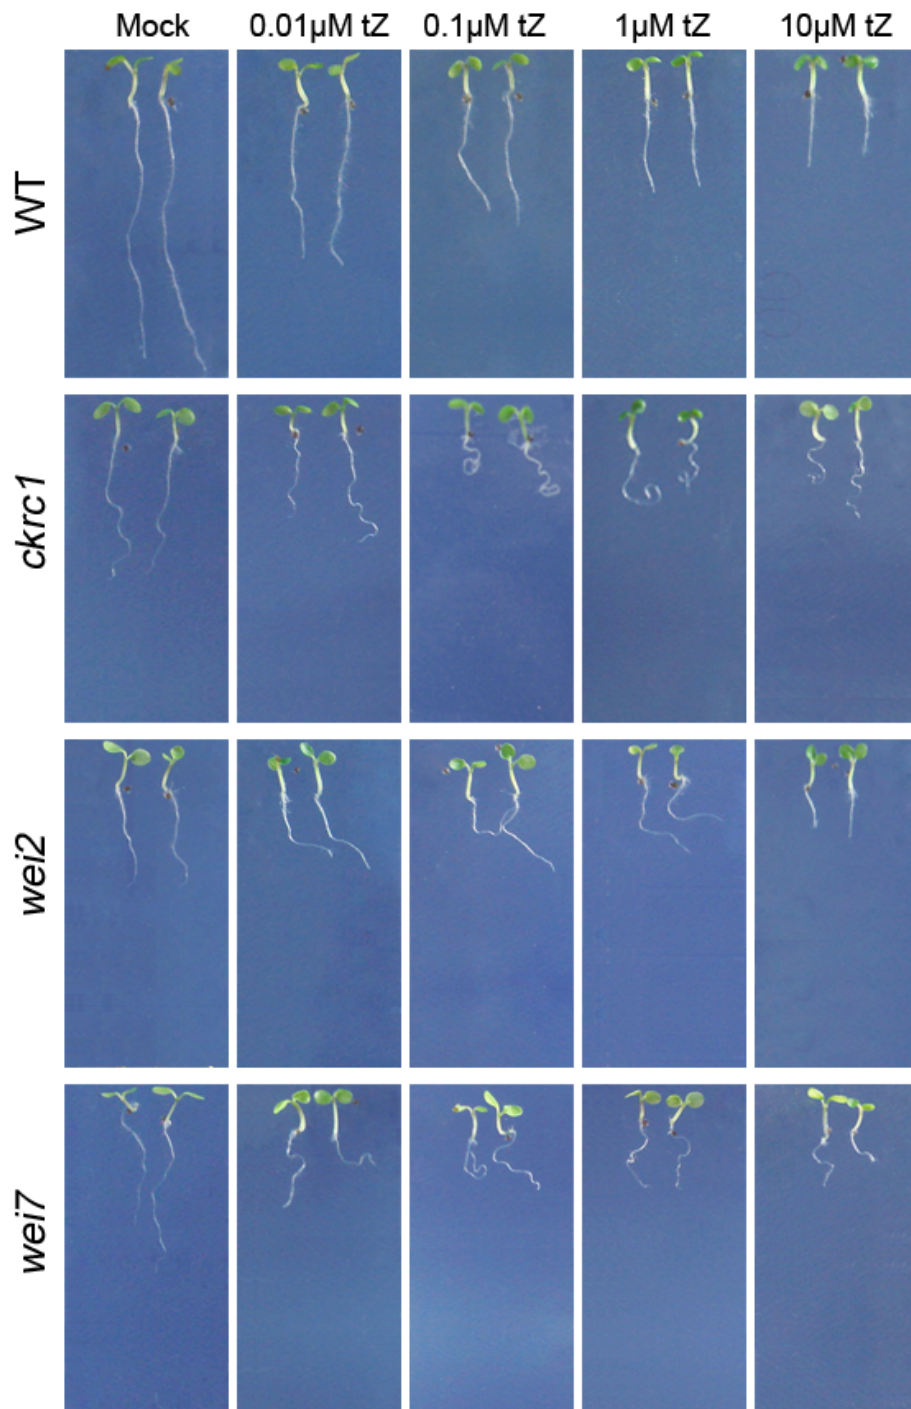

**Supplementary Fig. S1 Root phenotypes of WT, *ckrc1-1*, *wei2* and *wei7* seedlings on MS plates with indicated cytokinin concentrations 7 DAG.**

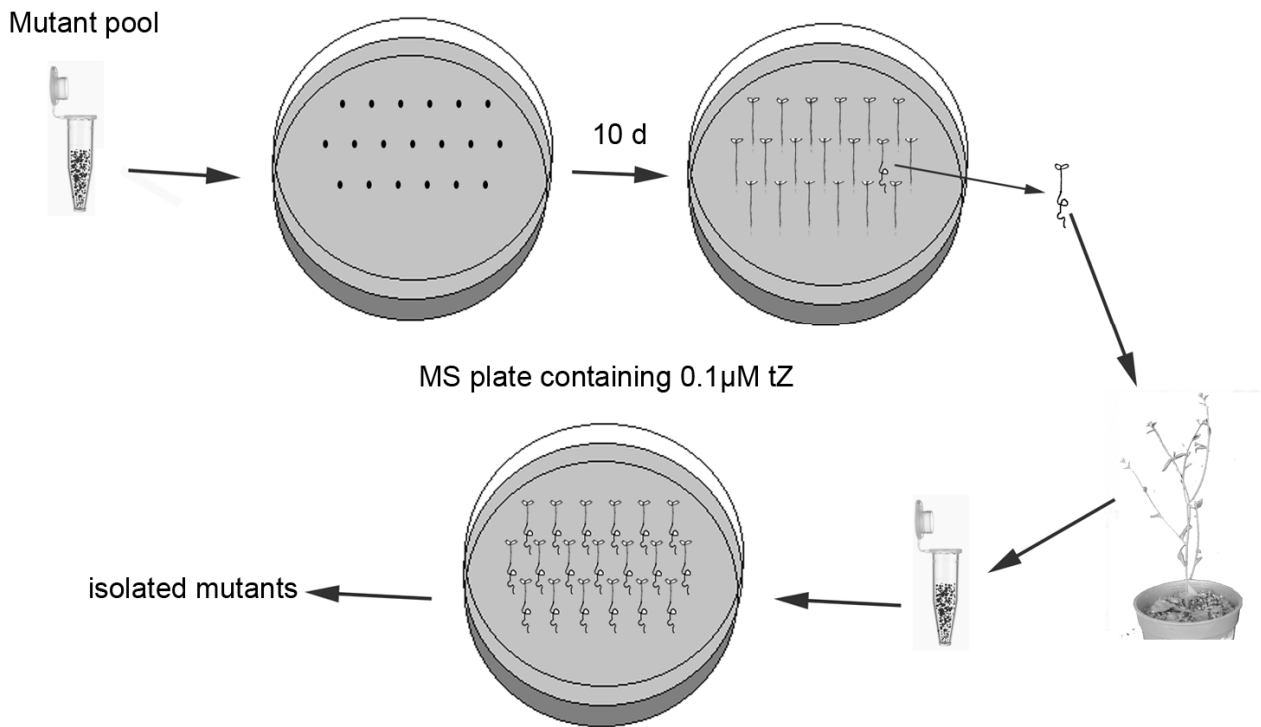

**Supplementary Fig. S2 Schematic diagram of the two-round forward genetic screen for mutants using CK-induced root curling/waving as a phenotypic marker.**

## Supplementary Appendix S1 PCR primer sequences

QRT-ARR5-F: CCAGTCATCCCAGGCATAGAGT

QRT-ARR5-R: GATCGGAAGTTCATCGAGCGG

QRT-ARR15-F: GGAGTGTCGTCATCAAGGGAG

QRT-ARR15-R: GAGGTGGTGAAGCTGAAGAAGG

QRT-ACT8-F: TGTGACAATGGTACTGGAATGG

QRT-ACT8-R: TTGGATTGTGCTTCATCACC

QRT-IAA1F(2): CGGTTAGATCTCACTGGAGGCCAT

QRT-IAA1R(2): ATCTGCTCCTCCTCCTGCAAAAAC

QRT-IAA2F: AGGAAGAGTCTAGAGCAGGAGC

QRT-IAA2R: ACTGGATGTTGGTTGGTGATG

**Supplementary Table S1 Summary information about the 53 mutants with curling (rc) or waving (rw) roots following tZ exposure obtained in the first large-scale screen.**

| <b>Mutant</b>       | <b>T-DNA vector</b> | <b>Dominant/recessive(r)</b> | <b>Flanking sequence</b>                            | <b>Allele</b>        | <b>Group</b> |
|---------------------|---------------------|------------------------------|-----------------------------------------------------|----------------------|--------------|
| <i>rc1</i>          | pROK2               | r                            | AT2g39990                                           | <i>pin2</i>          | I            |
| <i>rc2</i>          | pROK2               | r                            |                                                     | <i>pin2</i>          | I            |
| <i>rc3</i>          | pROK2               | r                            | <b>AT2g38120 (AUX1)</b>                             | <i>aux1</i>          | I            |
| <i>rc4</i>          | pROK2               | r                            | <b>AT1g70560 (CKRC1)</b>                            | <i>ckrc1</i>         | II           |
| <i>rc5</i>          | pROK2               | r                            | <b>AT1g70560 (CKRC1)</b>                            | <i>ckrc1</i>         | II           |
| <i>rc6</i>          | pROK2               | r                            | AT1g01650; AT4g21903; <b>AT5g57090 (PIN2)</b>       | <i>pin2</i>          | I            |
| <i>rc7</i>          | pROK2               | r                            | AT2g43140-AT2g43150; <b>AT2g38120 (AUX1)</b>        | <i>aux1</i>          | I            |
| <i>rc8</i>          | pROK2               | r                            | AT1g53930-AT1g53935; <b>AT1g70560 (CKRC1)</b>       | <i>ckrc1</i>         | II           |
| <i>rc9</i>          | pROK2               | r                            | <b>AT2g38120 (AUX1)</b>                             | <i>aux1</i>          | I            |
| <i>rc10</i>         | pROK2               | r                            | AT2g11740; AT1g53930-AT1g53935; AT2g47130-AT2g47140 | <i>pin2</i>          | I            |
| <i>rc11</i>         | pROK2               | r                            | AT1g61940-AT1g61950                                 | <i>aux1</i>          | I            |
| <i>rc12</i>         | pSKI015             | r                            |                                                     | <i>aux1</i>          | I            |
| <i>rc13</i>         | pSKI015             | r                            | AT4g27745                                           | <i>wei7</i>          | II           |
| <i>rc14</i>         | pSKI015             | r                            | AT4g27745                                           | <i>ckrc1</i>         | II           |
| <i>rc15</i>         | pSKI015             | r                            | AT4g27745; <b>AT1g70560 (CKRC1)</b>                 | <i>ckrc1</i>         | II           |
| <i>rc16</i>         | pSKI015             | r                            | <b>AT1g70560 (CKRC1)</b>                            | <i>ckrc1</i>         | II           |
| <i>rc17</i>         | pSKI015             | r                            | AT5g04340-AT5g04347                                 | <i>aux1</i>          | I            |
| <i>rc18</i>         | PROK2               | r                            | AT1g61940-AT1g61950                                 | <i>aux1</i>          | I            |
| <i>rc19</i>         | pSKI015             | r                            | <b>AT1g70560 (CKRC1)</b>                            | <i>ckrc1</i>         | II           |
| <i>rc20</i>         | pSKI015             | r                            | <b>AT1g70560 (CKRC1)</b>                            | <i>ckrc1</i>         | II           |
| <i>rc21</i>         | pSKI015             | r                            | <b>AT2g38120 (AUX1)</b>                             | <i>aux1</i>          | I            |
| <i>rc22</i>         | pSKI015             | r                            | AT2g17390; <b>AT1g70560 (CKRC1)</b>                 | <i>ckrc1</i>         | II           |
| <i>rc23</i>         | pSKI015             | r                            | AT3g55210-AT3g55220; <b>AT2g38120 (AUX1)</b>        | <i>aux1</i>          | I            |
| <i>rc24</i>         | pSKI015             | r                            | AT2g46950 (CYP709B2)                                | <i>wei2</i>          | II           |
| <i>rc25</i>         | pSKI015             | r                            | AT3g55210-AT3g55220                                 | <i>aux1</i>          | I            |
| <b><i>rc26*</i></b> | <b>pSKI015</b>      | <b>r</b>                     |                                                     | <b><i>ckrc2*</i></b> | <b>II</b>    |
| <i>rc27</i>         | pSKI015             | r                            | AT4g01260-AT4g01265                                 | <i>aux1</i>          | I            |
| <i>rc28</i>         | pSKI015             | r                            | AT1g71280-AT1g71290; AT5g48000-AT5g48010            | <i>aux1</i>          | I            |
| <i>rc29</i>         | pSKI015             | r                            | <b>AT2g38120 (AUX1)</b>                             | <i>aux1</i>          | I            |
| <i>rc30</i>         | pSKI015             | r                            | <b>AT5g57090 (PIN2)</b>                             | <i>pin2</i>          | I            |
| <i>rc31</i>         | pSKI015             | r                            | AT2g14450-AT2g14455; AT2g17930                      | <i>aux1</i>          | I            |
| <i>rc32</i>         | pSKI015             | r                            | AT3g55210-AT3g55220; <b>AT2g38120 (AUX1)</b>        | <i>aux1</i>          | I            |
| <i>rc33</i>         | pSKI015             | r                            | AT3g51860-AT3g51870                                 | <i>aux1</i>          | I            |
| <i>rc34</i>         | pSKI015             | r                            |                                                     | <i>pin2</i>          | I            |
| <b><i>rw2*</i></b>  | <b>pSKI015</b>      | <b>r</b>                     | AT5g25425-AT5g25430                                 | <b><i>ckrw2*</i></b> | <b>III</b>   |

|                    |                |          |                                                                       |  |            |                      |            |
|--------------------|----------------|----------|-----------------------------------------------------------------------|--|------------|----------------------|------------|
| <i>rc36</i>        | pSKI015        | r        |                                                                       |  |            | <i>wei7</i>          | II         |
| <i>rc37</i>        | pSKI015        | r        |                                                                       |  |            | <i>aux1</i>          | I          |
| <i>rc38</i>        | pSKI015        | r        |                                                                       |  |            | <i>pin2</i>          | I          |
| <b><i>rw1*</i></b> | <b>pSKI015</b> | <b>r</b> | <b>AT5g49665 (<i>WAV3</i>); AT4g18430; AT4g08090</b>                  |  |            | <b><i>ckrw1*</i></b> | <b>III</b> |
| <i>rc40</i>        | pSKI015        | r        |                                                                       |  |            | <i>aux1</i>          | I          |
| <i>rc41</i>        | pSKI015        | r        |                                                                       |  |            | <i>ckrc1</i>         | II         |
| <i>rc42</i>        | pSKI015        | r        |                                                                       |  |            | <i>aux1</i>          | I          |
| <i>rc43</i>        | pSKI015        | r        |                                                                       |  |            | <i>wei7</i>          | II         |
| <i>rc44</i>        | pSKI015        | r        |                                                                       |  |            | <i>pin2</i>          | I          |
| <i>rc45</i>        | pSKI015        | r        |                                                                       |  |            | <i>pin2</i>          | I          |
| <i>rc46</i>        | pSKI015        | r        | AT1g15680-AT1g15690;<br>AT2g14450-AT2g14455                           |  | AT1g15780; | <i>pin2</i>          | I          |
| <i>rc47</i>        | pSKI015        | r        | AT4g27745; AT1g71280-AT1g71290; AT1g15780                             |  |            | <i>wei7</i>          | II         |
| <i>rc48</i>        | pSKI015        | r        | AT2g14450-AT2g14455; AT5g06610                                        |  |            | <i>wei7</i>          | II         |
| <i>rc49</i>        | pSKI015        | r        | AT2g14450-AT2g14455; AT1g68820-AT1g68825;<br><b>AT1G70560 (CKRC1)</b> |  |            | <i>ckrc1</i>         | II         |
| <i>rc50</i>        | pSKI015        | r        |                                                                       |  |            | <i>wei2</i>          | II         |
| <i>rc51</i>        | pSKI015        | r        | AT2g14450-AT2g14455                                                   |  |            | <i>aux1</i>          | I          |
| <i>rc52</i>        | pSKI015        | r        | AT5g14910-AT5g14920; AT2g14450-AT2g14455;<br><b>AT1g70560 (CKRC1)</b> |  |            | <i>ckrc1</i>         | II         |
| <i>rc53</i>        | pSKI015        | r        |                                                                       |  |            | <i>ckrc1</i>         | II         |

**Supplementary Table S2 Summary information about the 96 mutants with curling or waving roots following tZ exposure obtained in the subsequent large-scale screen.**

| Pools    | Vector    | Ecotype | No. of lines | No. seedlings screened | No. isolated mutants | No. confirmed known alleles                            | New rc/rw mutants                       | Group         |
|----------|-----------|---------|--------------|------------------------|----------------------|--------------------------------------------------------|-----------------------------------------|---------------|
| CS 31400 | pSKI015   | C24     | ~9,700       | ~24,700                | 2                    |                                                        |                                         |               |
| CS 31402 | pSKI015   | C24     | ~4,000       | ~10,320                | 1                    | 1 <i>aux1</i>                                          |                                         | I             |
| CS 21991 | pSKI015   | Col-7   | ~8,200       | ~108,810               | 6                    | 3 <i>aux1</i> ,<br>2 <i>pin2</i>                       |                                         | I<br>I        |
| CS 21995 | pSKI015   | Col-7   | ~8,600       | ~48,860                | 1                    |                                                        |                                         |               |
| CS 23153 | pSKI015   | Col-7   | ~6,200       | ~63,900                | 16                   | 1 <i>ckrc1</i> ,<br>5 <i>pin2</i> ,<br>1 <i>wei2</i> , | <i>ckrc3(ddw41)</i>                     | II<br>I<br>II |
| CS 31087 | pD991     | Col-6   | ~11,300      | ~113,060               | 16                   | 2 <i>ckrc1</i> ,<br>9 <i>aux1</i> ,<br>1 <i>pin2</i>   | <i>ckrc4(zb11)</i><br><i>crcl(le10)</i> | II<br>I<br>I  |
| CS 22830 | pD991-AP3 | Ws-2    | ~37,800      | ~408,140               | 11                   | 4 <i>aux1</i> ,<br>1 <i>pin2</i> ,                     |                                         | I<br>I        |

---

|          |           |      |         |          |    |                  |                      |    |
|----------|-----------|------|---------|----------|----|------------------|----------------------|----|
|          |           |      |         |          |    | 1 <i>tir1</i>    | <i>crc4(za212)</i>   | I  |
|          |           |      |         |          |    |                  | <i>crc2(lb2)</i>     | I  |
|          |           |      |         |          |    |                  | <i>ckrc2-2(lb72)</i> | II |
|          |           |      |         |          |    |                  | <i>ckrc5(lb113)</i>  | II |
| CS 6502  | 3850:1003 | Ws-2 | ~6,500  | ~71,580  | 4  |                  |                      |    |
| CS 84442 | 3850:1003 | Ws-2 | ~4,000  | ~40,050  | 39 | 32 <i>pin2</i> , | <i>crc3(c5)</i>      | I  |
|          |           |      |         |          |    | 1 <i>aux1</i> ,  |                      |    |
| Total    |           |      | ~59,600 | ~632,830 | 96 | 64               | 8                    |    |

---
